# Supplementary material
Source: PubMed Central journal article supplement (PMC4810824)
Supplement: rspb20152413supp2.pdf [file rspb20152413supp2.pdf]

CLIMATE DATA

| POPULATION | LATITUDE   | LONGITUDE  | ANNUAL MEAN TEMP (°C) | MEAN TEMP Jan (°C) | MEAN TEMP Feb (°C) | MEAN TEMP Mar (°C) | MEAN TEMP Apr (°C) | MEAN TEMP May (°C) | MEAN TEMP Jun (°C) | MEAN TEMP Jul (°C) | MEAN TEMP Aug (°C) | MEAN TEMP Sep (°C) | MEAN TEMP Oct (°C) | MEAN TEMP Nov (°C) | MEAN TEMP Dec (°C) |
|------------|------------|------------|-----------------------|--------------------|--------------------|--------------------|--------------------|--------------------|--------------------|--------------------|--------------------|--------------------|--------------------|--------------------|--------------------|
| MF         | 45.8616760 | 4.8865000  | 11.01                 | 2.0                | 3.4                | 7.3                | 10.4               | 14.3               | 17.9               | 20.2               | 19.6               | 16.6               | 11.4               | 6.4                | 2.9                |
| MG         | 50.1680610 | 9.0819270  | 9.74                  | 0.3                | 1.5                | 5.6                | 9.7                | 13.8               | 17.2               | 18.8               | 18.1               | 14.9               | 10.1               | 5.1                | 2.0                |
| NB1        | 51.2422660 | 5.4045440  | 9.50                  | 2.1                | 2.7                | 5.2                | 8.5                | 12.6               | 15.6               | 17.0               | 16.9               | 14.4               | 10.7               | 5.8                | 2.9                |
| NB2        | 51.0945880 | 4.9541040  | 9.91                  | 2.2                | 3.2                | 5.7                | 9.0                | 13.0               | 16.1               | 17.4               | 17.3               | 15.0               | 11.1               | 6.1                | 3.2                |
| NG         | 53.2714260 | 9.6075250  | 8.50                  | -0.1               | 0.4                | 3.6                | 7.8                | 12.1               | 15.3               | 17.0               | 16.7               | 13.9               | 9.3                | 4.7                | 1.7                |
| NMF        | 49.1765430 | 6.2156670  | 9.87                  | 1.4                | 2.7                | 5.8                | 9.2                | 13.3               | 16.6               | 18.4               | 17.9               | 15.1               | 10.5               | 5.4                | 2.6                |
| SB         | 42.6865040 | 23.3195660 | 10.19                 | -1.2               | 1.2                | 5.2                | 10.1               | 14.8               | 18.1               | 20.0               | 20.1               | 16.6               | 11.3               | 5.5                | 0.8                |
| SBB        | 43.4360940 | 28.1378290 | 11.36                 | 1.1                | 2.0                | 4.7                | 9.8                | 14.8               | 19.2               | 21.2               | 21.1               | 18.0               | 12.9               | 8.1                | 3.7                |
| SBK        | 42.5750560 | 23.4168330 | 8.80                  | -2.2               | -0.1               | 3.6                | 8.4                | 13.1               | 16.5               | 18.4               | 18.5               | 15.2               | 9.9                | 4.5                | 0.0                |
| SBP        | 42.5446460 | 23.4865230 | 8.53                  | -2.4               | -0.4               | 3.3                | 8.1                | 12.9               | 16.2               | 18.2               | 18.2               | 14.8               | 9.7                | 4.3                | -0.3               |
| SI         | 45.4036180 | 8.3473320  | 12.06                 | 1.6                | 3.9                | 7.8                | 11.7               | 16.0               | 19.7               | 22.3               | 21.5               | 18.2               | 12.7               | 6.9                | 2.7                |
| SP160      | 40.7813900 | -8.5102680 | 14.73                 | 9.4                | 10.0               | 12.4               | 14.1               | 15.7               | 18.4               | 19.6               | 19.9               | 18.9               | 16.3               | 12.5               | 9.9                |
| SP164      | 40.6823520 | -8.2204920 | 13.72                 | 7.6                | 8.4                | 10.7               | 12.6               | 14.5               | 18.2               | 20.1               | 20.5               | 18.6               | 15.1               | 10.7               | 8.0                |
| SP194b     | 41.5719440 | -8.3600000 | 13.30                 | 7.4                | 8.2                | 10.2               | 12.0               | 14.2               | 17.6               | 19.8               | 19.6               | 18.0               | 14.6               | 10.4               | 7.8                |
| SP235      | 40.6822220 | -8.2202780 | 13.72                 | 7.6                | 8.4                | 10.7               | 12.6               | 14.5               | 18.2               | 20.1               | 20.5               | 18.6               | 15.1               | 10.7               | 8.0                |
| SP71       | 39.7830560 | -8.8088890 | 15.77                 | 10.7               | 11.4               | 13.2               | 14.7               | 16.4               | 19.1               | 20.5               | 21.0               | 19.9               | 17.5               | 13.7               | 11.3               |
| SP75       | 39.7547220 | -8.9355560 | 15.41                 | 10.6               | 11.2               | 13.0               | 14.5               | 16.0               | 18.6               | 19.8               | 20.3               | 19.3               | 17.2               | 13.6               | 11.3               |
| SP8A       | 40.7413890 | -8.5280560 | 14.72                 | 9.3                | 10.0               | 12.4               | 14.1               | 15.7               | 18.4               | 19.6               | 19.9               | 18.9               | 16.3               | 12.5               | 9.9                |
| SSA        | 37.2538690 | -4.5413490 | 16.59                 | 8.8                | 10.1               | 12.3               | 14.6               | 17.8               | 22.5               | 25.8               | 25.8               | 22.3               | 17.4               | 12.6               | 9.4                |
| SSB        | 37.3990800 | -4.5267980 | 16.47                 | 8.4                | 9.8                | 12.1               | 14.5               | 17.8               | 22.6               | 26.0               | 25.9               | 22.4               | 17.2               | 12.3               | 9.0                |
| STC        | 40.5845530 | 35.0049780 | 9.48                  | -1.3               | 0.3                | 4.1                | 9.4                | 13.5               | 16.7               | 19.1               | 18.9               | 15.7               | 10.9               | 5.6                | 1.1                |
| STP        | 41.1790170 | 40.8941780 | 13.70                 | 6.3                | 6.6                | 7.8                | 11.6               | 15.3               | 19.1               | 21.6               | 21.7               | 19.2               | 15.4               | 11.8               | 8.3                |

GENERATIONS / A

| POPULATION | LATITUDE   | LONGITUDE  | AVERAGE ANNUAL GENERATIONS | AVERAGE GEN Jan | AVERAGE GEN Feb | AVERAGE GEN Mar | AVERAGE GEN Apr | AVERAGE GEN May | AVERAGE GEN Jun | AVERAGE GEN Jul | AVERAGE GEN Aug | AVERAGE GEN Sep | AVERAGE GEN Oct | AVERAGE GEN Nov | AVERAGE GEN Dec |
|------------|------------|------------|----------------------------|-----------------|-----------------|-----------------|-----------------|-----------------|-----------------|-----------------|-----------------|-----------------|-----------------|-----------------|-----------------|
| MF         | 45.8616760 | 4.8865000  | 9.07                       | 0.08            | 0.10            | 0.26            | 0.48            | 0.97            | 1.45            | 1.82            | 1.74            | 1.27            | 0.59            | 0.21            | 0.10            |
| MG         | 50.1680610 | 9.0819270  | 7.85                       | 0.05            | 0.06            | 0.18            | 0.42            | 0.90            | 1.35            | 1.63            | 1.53            | 1.03            | 0.46            | 0.16            | 0.08            |
| NB1        | 51.2422660 | 5.4045440  | 7.00                       | 0.08            | 0.08            | 0.16            | 0.32            | 0.74            | 1.12            | 1.38            | 1.36            | 0.95            | 0.52            | 0.18            | 0.10            |
| NB2        | 51.0945880 | 4.9541040  | 7.44                       | 0.08            | 0.09            | 0.18            | 0.36            | 0.79            | 1.19            | 1.44            | 1.41            | 1.03            | 0.56            | 0.20            | 0.10            |
| NG         | 53.2714260 | 9.6075250  | 6.43                       | 0.05            | 0.05            | 0.11            | 0.28            | 0.67            | 1.08            | 1.37            | 1.33            | 0.88            | 0.40            | 0.14            | 0.07            |
| NMF        | 49.1765430 | 6.2156670  | 7.70                       | 0.07            | 0.08            | 0.19            | 0.37            | 0.83            | 1.27            | 1.58            | 1.51            | 1.05            | 0.50            | 0.16            | 0.09            |
| SB         | 42.6865040 | 23.3195660 | 8.91                       | 0.04            | 0.06            | 0.16            | 0.45            | 1.04            | 1.49            | 1.79            | 1.80            | 1.27            | 0.58            | 0.17            | 0.06            |
| SBB        | 43.4360940 | 28.1378290 | 9.89                       | 0.06            | 0.07            | 0.15            | 0.43            | 1.04            | 1.64            | 1.93            | 1.92            | 1.47            | 0.78            | 0.30            | 0.12            |
| SBK        | 42.5750560 | 23.4168330 | 7.43                       | 0.03            | 0.04            | 0.11            | 0.32            | 0.81            | 1.25            | 1.58            | 1.59            | 1.06            | 0.45            | 0.13            | 0.05            |
| SBP        | 42.5446460 | 23.4865230 | 7.16                       | 0.03            | 0.04            | 0.11            | 0.30            | 0.77            | 1.21            | 1.54            | 1.54            | 1.01            | 0.43            | 0.13            | 0.05            |
| SI         | 45.4036180 | 8.3473320  | 10.57                      | 0.07            | 0.11            | 0.29            | 0.61            | 1.23            | 1.70            | 2.03            | 1.96            | 1.49            | 0.75            | 0.23            | 0.09            |
| SP160      | 40.7813900 | -8.5102680 | 12.66                      | 0.40            | 0.41            | 0.72            | 0.91            | 1.17            | 1.52            | 1.74            | 1.77            | 1.59            | 1.26            | 0.71            | 0.45            |
| SP164      | 40.6823520 | -8.2204920 | 11.40                      | 0.28            | 0.30            | 0.53            | 0.71            | 0.99            | 1.49            | 1.80            | 1.85            | 1.56            | 1.08            | 0.51            | 0.30            |
| SP194b     | 41.5719440 | -8.3600000 | 10.80                      | 0.27            | 0.29            | 0.48            | 0.65            | 0.95            | 1.42            | 1.76            | 1.74            | 1.47            | 1.01            | 0.48            | 0.29            |
| SP235      | 40.6822220 | -8.2202780 | 11.40                      | 0.28            | 0.30            | 0.53            | 0.71            | 0.99            | 1.49            | 1.80            | 1.85            | 1.56            | 1.08            | 0.51            | 0.30            |
| SP71       | 39.7830560 | -8.8088890 | 14.15                      | 0.53            | 0.54            | 0.81            | 1.00            | 1.29            | 1.62            | 1.85            | 1.90            | 1.72            | 1.45            | 0.86            | 0.59            |
| SP75       | 39.7547220 | -8.9355560 | 13.61                      | 0.51            | 0.52            | 0.79            | 0.96            | 1.23            | 1.55            | 1.77            | 1.82            | 1.64            | 1.40            | 0.84            | 0.58            |
| SP8A       | 40.7413890 | -8.5280560 | 12.65                      | 0.40            | 0.41            | 0.72            | 0.91            | 1.17            | 1.52            | 1.74            | 1.77            | 1.59            | 1.26            | 0.71            | 0.45            |
| SSA        | 37.2538690 | -4.5413490 | 15.02                      | 0.36            | 0.42            | 0.70            | 0.98            | 1.49            | 1.99            | 2.28            | 2.28            | 1.97            | 1.43            | 0.71            | 0.41            |
| SSB        | 37.3990800 | -4.5267980 | 14.86                      | 0.33            | 0.39            | 0.68            | 0.96            | 1.49            | 2.00            | 2.29            | 2.28            | 1.98            | 1.41            | 0.68            | 0.38            |
| STC        | 40.5845530 | 35.0049780 | 7.99                       | 0.04            | 0.05            | 0.13            | 0.39            | 0.86            | 1.28            | 1.67            | 1.65            | 1.14            | 0.55            | 0.17            | 0.06            |
| STP        | 41.1790170 | 40.8941780 | 11.69                      | 0.21            | 0.20            | 0.29            | 0.60            | 1.11            | 1.62            | 1.97            | 1.98            | 1.63            | 1.13            | 0.62            | 0.32            |

All data for these calculations were downloaded from the WorldClim database (2.5 arc-min resolution, ~1950-2000).
