# Supplementary material
Source: PubMed Central journal article supplement (PMC4810824)
Supplement: rspb20152413supp3.pdf [file rspb20152413supp3.pdf]

| Population | marker | sequences | polymorphisms | haplotypes | $\pi$   | $\theta$ from $\pi$ | Tajima's D | Tajima's D p-value | ANNUAL MEAN TEMP (°C) | generations/a | average distance to ancestral haplotype |
|------------|--------|-----------|---------------|------------|---------|---------------------|------------|--------------------|-----------------------|---------------|-----------------------------------------|
| MF         | COI    | 185       | 12            | 13         | 0.00083 | 0.00083             | -2.10749   | < 0.05             | 11.01                 | 9.07          | 0.0007148                               |
| MG         | COI    | 104       | 8             | 11         | 0.00174 | 0.00174             | -1.5315    | ns                 | 9.74                  | 7.85          | 0.00087831                              |
| NB2        | COI    | 6         | 0             | 1          | 0       | 0                   | na         | na                 | 9.91                  | 7.44          | 0                                       |
| NG         | COI    | 10        | 1             | 2          | 0.00036 | 0.00036             | -1.11173   | ns                 | 8.50                  | 6.43          | 0.00017575                              |
| NMF        | COI    | 50        | 5             | 6          | 0.00069 | 0.00069             | -1.73932   | ns                 | 9.87                  | 7.70          | 0.00040175                              |
| SB         | COI    | 31        | 0             | 1          | 0       | 0                   | na         | na                 | 10.19                 | 8.91          | 0                                       |
| SBKP       | COI    | 11        | 1             | 2          | 0.00093 | 0.00093             | -1.1285    | ns                 | 8.80                  | 7.30          | 0.00078466                              |
| SI         | COI    | 33        | 0             | 1          | 0       | 0                   | na         | na                 | 12.06                 | 10.57         | 0.00014569                              |
| SP160      | COI    | 27        | 5             | 5          | 0.00297 | 0.00298             | 0.32451    | ns                 | 14.73                 | 12.66         | 0.00369836                              |
| SP164      | COI    | 19        | 5             | 5          | 0.00285 | 0.00286             | 0.50054    | ns                 | 13.72                 | 11.40         | 0.0041355                               |
| SP194b     | COI    | 21        | 7             | 7          | 0.00474 | 0.00477             | 0.18576    | ns                 | 13.30                 | 10.80         | 0.00422067                              |
| SP235      | COI    | 30        | 7             | 6          | 0.00295 | 0.00296             | -0.22533   | ns                 | 13.72                 | 11.40         | 0.00385777                              |
| SP71       | COI    | 34        | 5             | 6          | 0.00245 | 0.00246             | 0.32752    | ns                 | 15.77                 | 14.15         | 0.00250389                              |
| SP75       | COI    | 35        | 5             | 5          | 0.00218 | 0.00219             | -0.1323    | ns                 | 15.41                 | 13.61         | 0.00282366                              |
| SP8A       | COI    | 31        | 7             | 7          | 0.00311 | 0.000312            | 0.03321    | ns                 | 14.72                 | 12.65         | 0.00275525                              |
| SSA        | COI    | 63        | 9             | 10         | 0.00137 | 0.00138             | -1.66641   | ns                 | 16.59                 | 15.02         | 0.00137703                              |
| SSB        | COI    | 88        | 8             | 8          | 0.00168 | 0.00169             | -1.40147   | ns                 | 16.47                 | 14.86         | 0.00108912                              |
| STC        | COI    | 19        | 0             | 1          | 0       | 0                   | na         | na                 | 9.48                  | 7.99          | 0                                       |

**statistics of COI data**

Ordinary Least Squares Regression: A-B

Slope a: 0.00 Std. error a: 0.00010789  
Intercept b: -0.0016548 Std. error b: 0.0013843

95% bootstrapped confidence intervals (N=1999):  
Slope a: (7.1295E-05, 0.00038657)  
Intercept b: (-0.0033187, 0.00031898)

Correlation:  
r: 0.51491  
r2: 0.26513  
t: 2.3263  
p (uncorr.): 0.034425  
Permutation p: 0.0359

| Population | marker | sequences | polymorphisms | haplotypes | $\pi$   | $\theta$ from $\pi$ | Tajima's D | Tajima's D p-value | ANNUAL MEAN TEMP (°C) | generations/a | average distance to ancestral haplotype |
|------------|--------|-----------|---------------|------------|---------|---------------------|------------|--------------------|-----------------------|---------------|-----------------------------------------|
| MF         | L44    | 348       | 17            | 25         | 0.00254 | 0.00255             | -1.2708    | ns                 | 11.01                 | 9.07          | 0.00165484                              |
| MG         | L44    | 44        | 10            | 13         | 0.00311 | 0.00312             | -1.11771   | ns                 | 9.74                  | 7.85          | 0.00181465                              |
| NB2        | L44    | 12        | 7             | 6          | 0.00439 | 0.00442             | 0.00035    | ns                 | 9.91                  | 7.44          | 0.00                                    |
| NG         | L44    | 16        | 3             | 5          | 0.00241 | 0.00242             | 1.13586    | ns                 | 8.50                  | 6.43          | 0.00173813                              |
| NMF        | L44    | 110       | 8             | 7          | 0.00105 | 0.00105             | -1.69836   | ns                 | 9.87                  | 7.70          | 0.00181418                              |
| SB         | L44    | 64        | 0             | 1          | 0       | 0                   | na         | na                 | 10.19                 | 8.91          | 0.00027844                              |
| SI         | L44    | 38        | 9             | 18         | 0.00653 | 0.00659             | 1.0259     | ns                 | 12.06                 | 10.57         | 0.00398105                              |
| SSA        | L44    | 92        | 10            | 13         | 0.00423 | 0.00425             | 0.26756    | ns                 | 16.59                 | 15.02         | 0.00338913                              |
| SSB        | L44    | 160       | 15            | 18         | 0.00345 | 0.00347             | -1.1137    | ns                 | 16.47                 | 14.86         | 0.00347038                              |
| SP194b     | L44    | 78        | 3             | 5          | 0.00181 | 0.00182             | 1.07954    | ns                 | 13.30                 | 10.80         | 0.00099                                 |
| STC        | L44    | 20        | 0             | 1          | 0       | 0                   | na         | na                 | 9.48                  | 7.99          | 0.000198                                |

**statistics of L44 data**

Ordinary Least Squares Regression: D-E

Slope a: 0.00027731 Std. error a: 0.00021922  
Intercept b: -0.00050536 Std. error b: 0.0025991

Correlation:  
r: 0.38854  
r2: 0.15096  
t: 1.265  
p (uncorr.): 0.23764  
Permutation p: 0.2474

| Population | marker   | sequences | polymorphisms | haplotypes | $\pi$   | $\theta$ from $\pi$ | Tajima's D | Tajima's D p-value | ANNUAL MEAN TEMP (°C) | generations/a | average distance to ancestral haplotype |
|------------|----------|-----------|---------------|------------|---------|---------------------|------------|--------------------|-----------------------|---------------|-----------------------------------------|
| MF         | PMCA3-E4 | 44        | 3             | 4          | 0.00196 | 0.00197             | -1.64246   | ns                 | 11.01                 | 9.07          | 0.00207905                              |
| MG         | PMCA3-E4 | 40        | 10            | 11         | 0.00228 | 0.00229             | -0.70539   | ns                 | 9.74                  | 7.85          | 0.00358099                              |
| NB2        | PMCA3-E4 | 12        | 3             | 4          | 0.00247 | 0.00247             | -0.12836   | ns                 | 9.91                  | 7.44          | 0.00292065                              |
| NG         | PMCA3-E4 | 14        | 2             | 3          | 0.0009  | 0.0009              | -1.45138   | ns                 | 8.50                  | 6.43          | 0.00306777                              |
| NMF        | PMCA3-E4 | 38        | 5             | 7          | 0.00247 | 0.00248             | -0.9273    | ns                 | 9.87                  | 7.70          | 0.00313993                              |
| SB         | PMCA3-E4 | 48        | 1             | 2          | 0.00202 | 0.00202             | 1.33417    | ns                 | 10.19                 | 8.91          | 0.00221336                              |
| SSA        | PMCA3-E4 | 44        | 6             | 7          | 0.00224 | 0.00225             | -0.62046   | ns                 | 16.59                 | 15.02         | 0.00433546                              |
| SSB        | PMCA3-E4 | 48        | 2             | 4          | 0.00309 | 0.0031              | 1.50191    | ns                 | 16.47                 | 14.86         | 0.00504609                              |
| SP194b     | PMCA3-E4 | 70        | 9             | 9          | 0.00099 | 0.00099             | -1.57174   | ns                 | 13.30                 | 10.80         | 0.00627161                              |

**statistics of PMCA3-E4 data**

Ordinary Least Squares Regression: B-C

Slope a: 8.35E-05 Std. error a: 8.31E-05

Intercept b: 0.0010724 Std. error b: 0.0010031

Correlation:

r: 0.35511

r2: 0.1261

t: 1.005

p (uncorr.): 0.34835

Permutation  $\rho$ : 0.3449

ns - not significant      na - not available

calculated in DnaSP v5.10.01

(Librado, P. & Rozas, J. 2009 DnaSP v5: A software for comprehensive analysis of DNA polymorphism data. Bioinformatics 25: 1451-1452)
